# Supplementary material for: Direct Solar Oven with and without UV Filter vs. Traditional Oven: Effect on Polyphenolic Antioxidants, Vitamins and Carotenoids of Food
Source: MDPI journal article supplement (doi:10.3390/molecules28083519), 2023-04-17
Supplement: s1 [file s1]

## Supporting Informations

**Table S1.** Time and temperature of cooked samples with different baking methods.

| sample     | time/cooking<br>temperature | electric oven | solar oven | solar oven<br>with filter |
|------------|-----------------------------|---------------|------------|---------------------------|
| carrots    | min                         | 25            | 20         | 30                        |
|            | °C                          | 179           | 178        | 177                       |
| onions     | min                         | 23            | 23         | 25                        |
|            | °C                          | 170           | 175        | 170                       |
| aubergines | min                         | 60            | 60         | 60                        |
|            | °C                          | 137           | 143        | 143                       |
| pepper     | min                         | 30            | 30         | 35                        |
|            | °C                          | 180           | 180        | 182                       |
| zucchini   | min                         | 15            | 15         | 12                        |
|            | °C                          | 175           | 182        | 182                       |
| chicken    | min                         | 25            | 30         | 30                        |
|            | °C                          | 185           | 183        | 185                       |
| pork loin  | min                         | 10            | 9          | 10                        |
|            | °C                          | 176           | 176        | 173                       |
| cod fish   | min                         | 18            | 18         | 18                        |
|            | °C                          | 189           | 185        | 177                       |
